# Supplementary material
Source: PubMed Central journal article supplement (PMC2741275)
Supplement: 0900141106_0900141106SI.pdf [file 0900141106_0900141106SI.pdf]

# Supporting Information

Baraban et al. 10.1073/pnas.0900141106

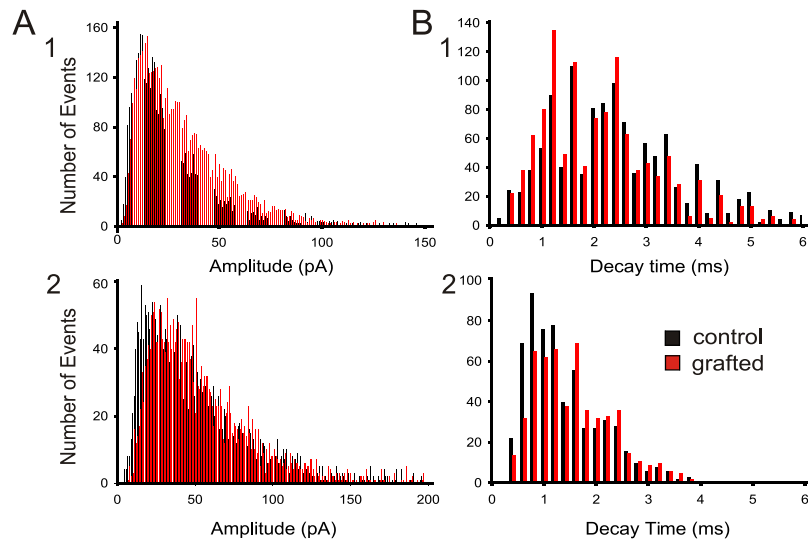

**Fig. S1.** IPSC amplitude and decay kinetics. (A) Cumulative amplitude frequency histograms of sIPSCs recorded from pyramidal cells (A1) and interneurons (A2) in the host brain. After MGE cell transplantation, the frequency distribution of sIPSCs recorded from either host pyramidal cells, but not interneurons, was statistically different (Kolmogorov–Smirnov test,  $P < 0.05$ ). Data are pooled from the same number of cells from either control or grafted mice; e.g.,  $n = 20$  cells in each group for pyramidal cells and  $n = 18$  for interneurons. (B) Cumulative decay-time frequency histograms of sIPSCs recorded from pyramidal cells (B1) and interneurons (B2) show no difference between control and grafted mice (Kolmogorov–Smirnov test,  $P > 0.05$ ).

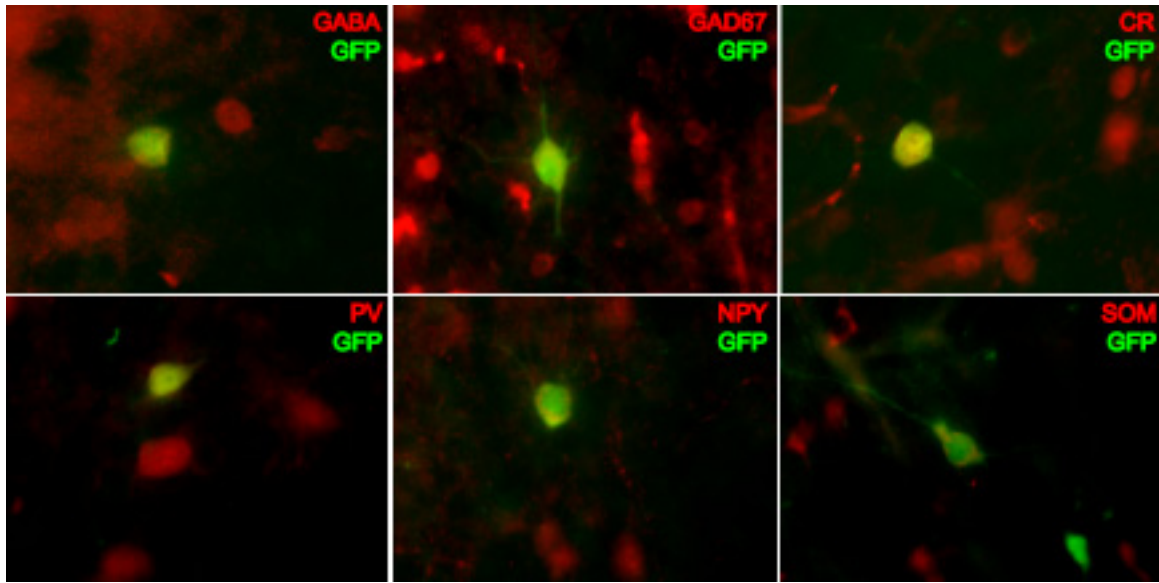

**Fig. S2.** Interneuron subtypes in Kv1.1 mice. Immunohistochemical coexpression of GFP<sup>+</sup> cells with GABA, GAD67, CR, PV, NPY, and SOM. Representative cortical neurons are shown at 30 DAT in tissue sections from Kv1.1<sup>-/-</sup> mice receiving bilateral MGE grafts at P2.

**Table S1. Analysis of EEG seizures**

| Animal                | Duration, sec* | Frequency, per hour | Seizure score |
|-----------------------|----------------|---------------------|---------------|
| <i>Kv1.1 KO</i>       |                |                     |               |
| No. 307               | 38.6 ± 3.7     | 0.6                 | Grade IV      |
| No. 419               | 57.5 ± 16.4    | 0.7                 | Grade IV      |
| No. 461               | 59.0 ± 9.3     | 2.2                 | Grade IV      |
| No. 466               | 58.0 ± 7.4     | 2.4                 | Grade IV      |
| No. 707               | 33.6 ± 1.7     | 1.0                 | Grade IV      |
| No. 729               | 50.9 ± 6.4     | 1.0                 | Grade IV      |
| No. 738               | 86.7 ± 2.2     | 0.5                 | Grade IV      |
| No. 747               | 59.6 ± 5.4     | 0.8                 | Grade IV      |
| <i>Kv1.1 KO + MGE</i> |                |                     |               |
| No. 428               | 24.7 ± 2.2     | 0.1                 | Grade IV      |
| No. 492               | 17.8 ± 2.2     | 0.1                 | Grade IV      |
| No. 525               | 0              | 0                   | Grade II      |
| No. 533               | 0              | 0                   | Grade II      |
| No. 544               | 23.7 ± 4.2     | 0.5                 | Grade IV      |
| No. 573               | 27.5 ± 4.4     | 0.4                 | Grade IV      |
| No. 575               | 28.0 ± 2.1     | 0.1                 | Grade IV      |
| No. 710               | 14.0 ± 3.1     | 0.1                 | Grade IV      |

\*Duration data are shown as mean ± SEM.
